# Supplementary material for: Directed synthesis of well dispersed and highly active AuCu and AuNi nanoparticle catalysts
Source: Royal Society of Chemistry journal article supplement (doi:10.1039/c6cy00799f), 2016-01-01
Supplement: c6cy00799f1.pdf [file c6cy00799f1.pdf]

## **Supporting Information**

**Directed synthesis of well dispersed and highly active AuCu and**

**AuNi nanoparticles catalysts**

Hanfei Wang<sup>a,b</sup>, Dan Liu<sup>a,b</sup>, Chunli Xu<sup>a,b,\*</sup>

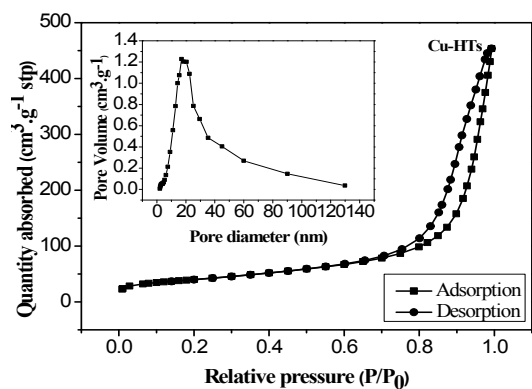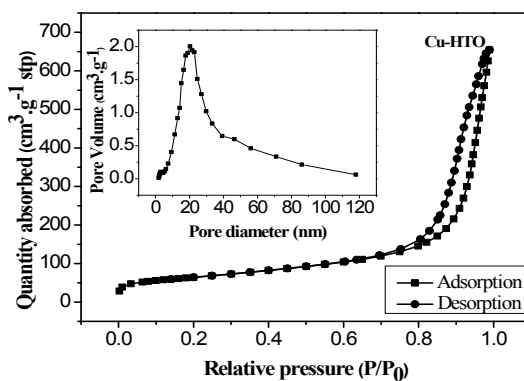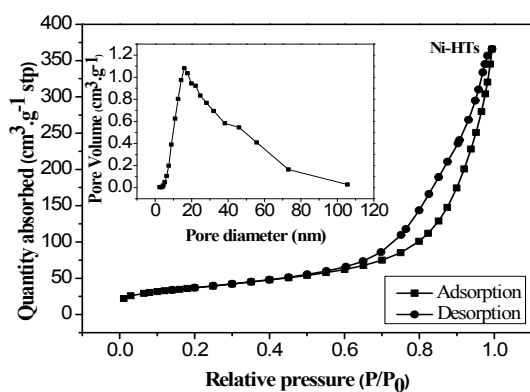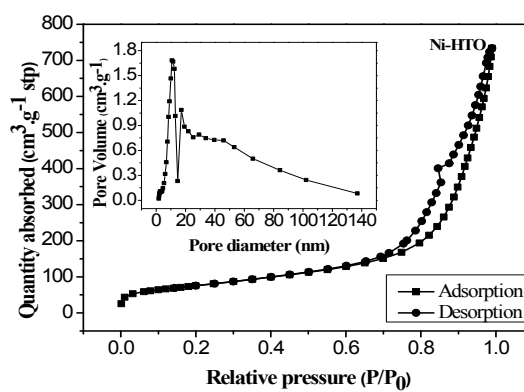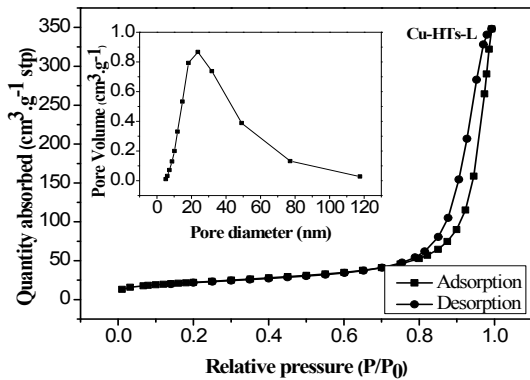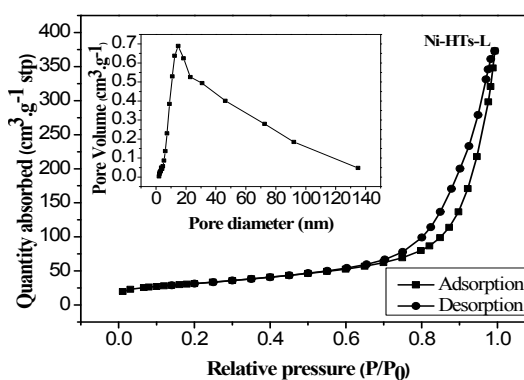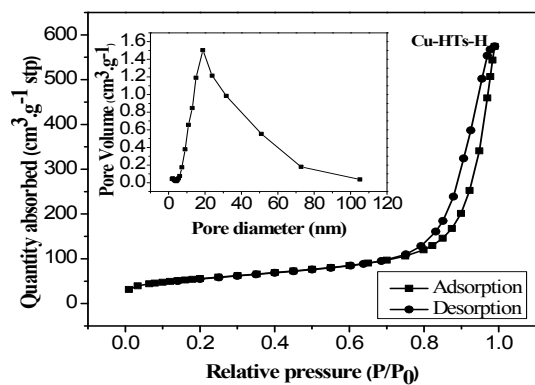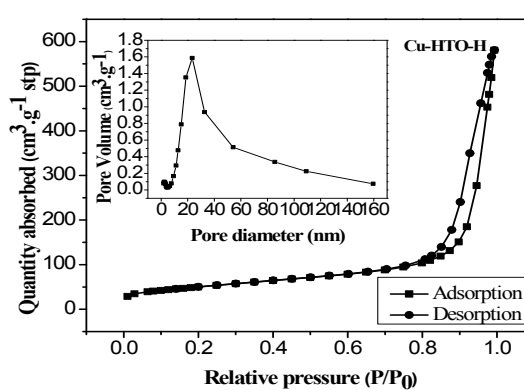

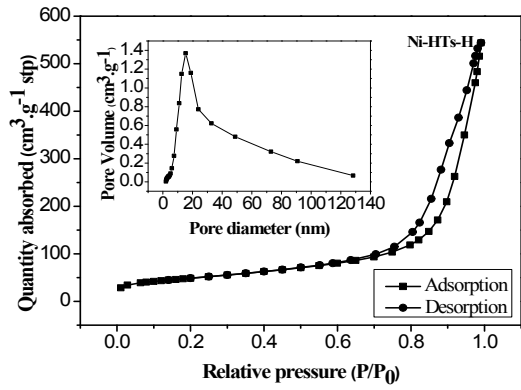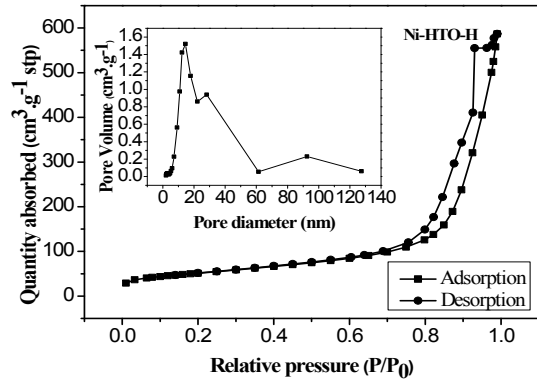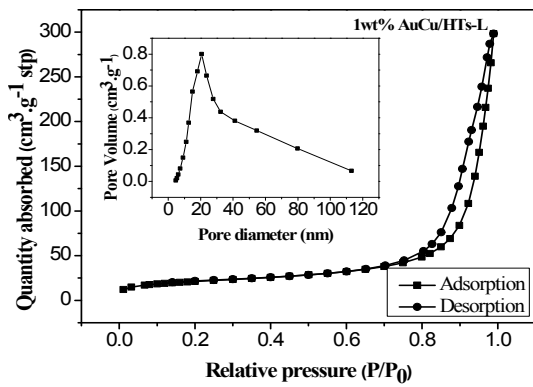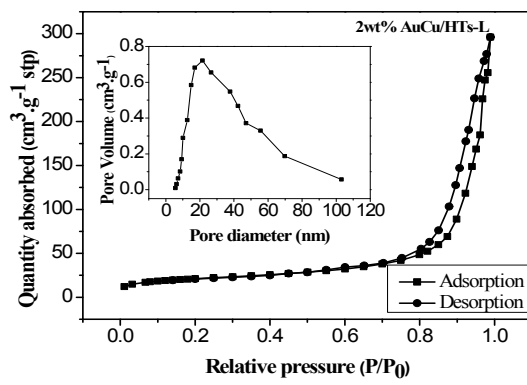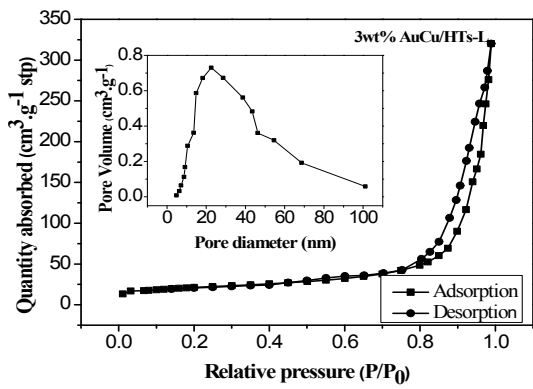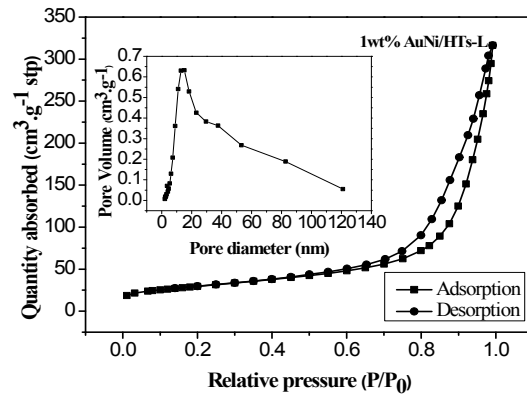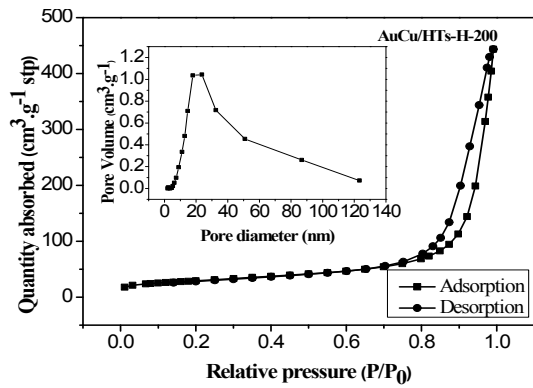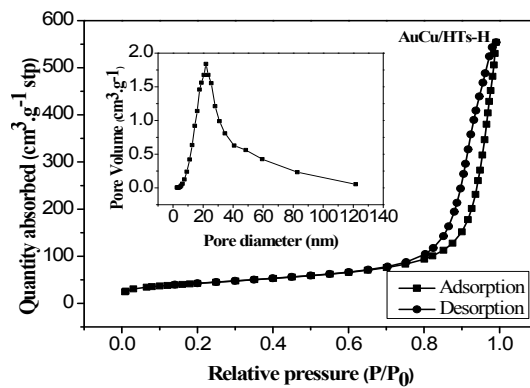

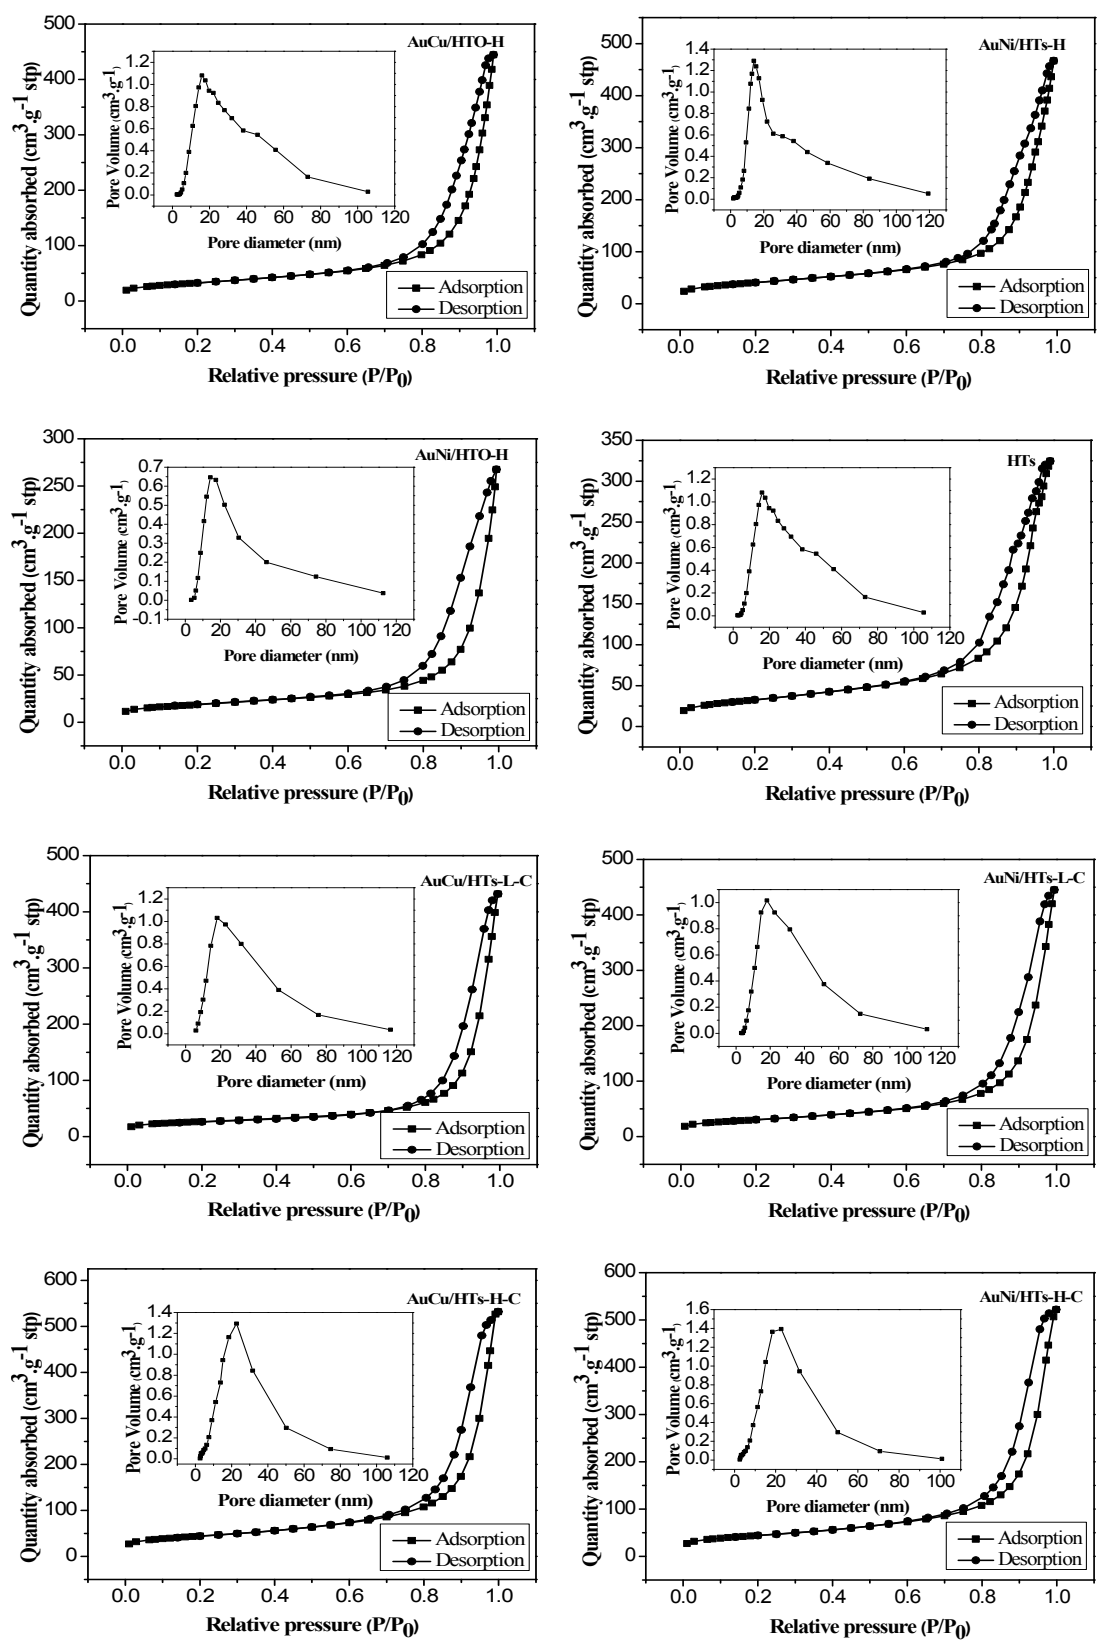

Fig. S1  $\text{N}_2$  adsorption–desorption isotherms and pore-size distributions

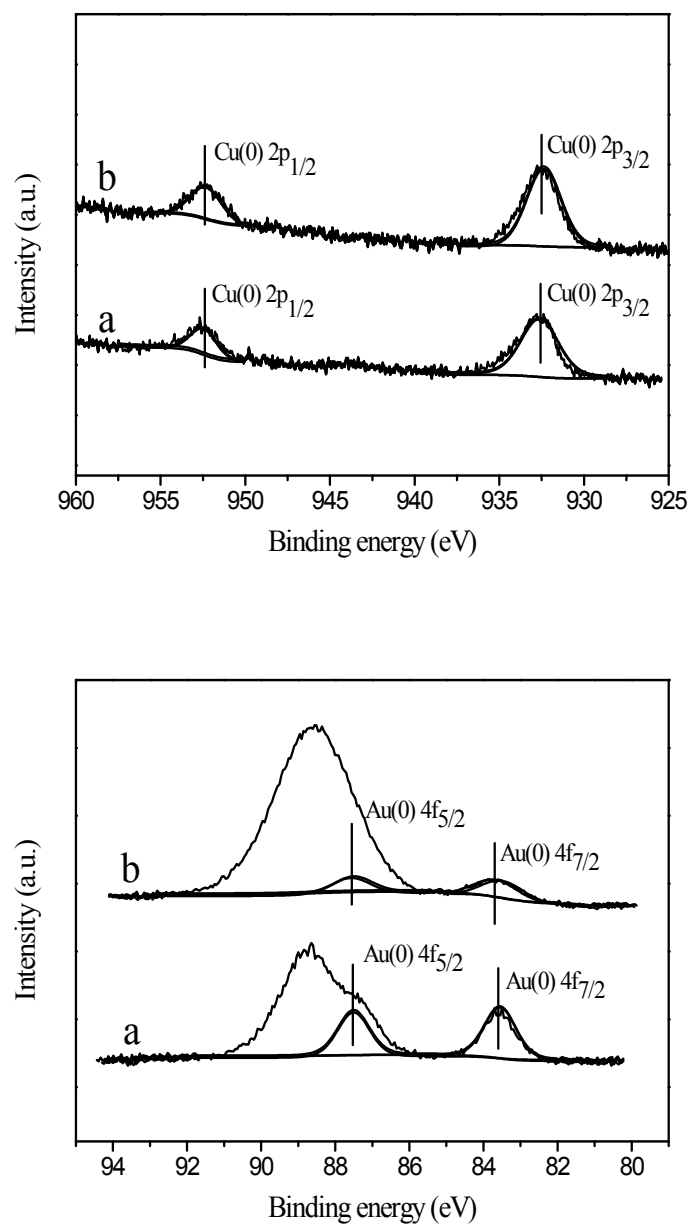

**Fig. S2** XPS spectra in Cu 2p or Au 4f regions for the AuCu catalysts prepared by traditional method. (a) AuCu/HTs-L-C, and (b) AuCu/HTs-H-C.

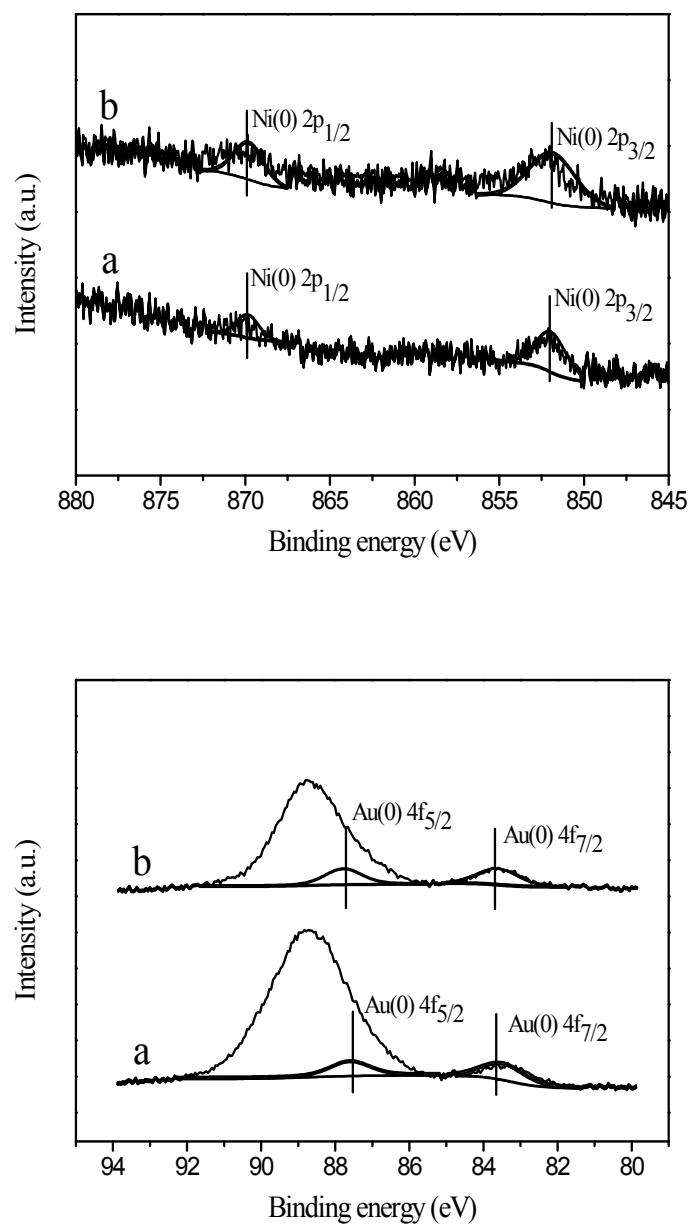

**Fig. S3** XPS spectra in Ni 2p or Au 4f regions for the AuNi catalysts prepared by traditional method. (a) AuNi/HTs-L-C, and (b) AuNi/HTs-H-C.
